# Supplementary material
Source: PubMed Central journal article supplement (PMC5998646)
Supplement: ucw057_10325_090916141546_marinova_web_appendix.pdf [file ucw057_10325_090916141546_marinova_web_appendix.pdf]

## Web Appendix

# To Prescribe or Not to Prescribe? Consumer Access to Life-Enhancing Products

DETELINA MARINOVA  
IRINA V. KOZLENKOVA  
LEONA CUTTLER  
J. B. SILVERS

The supplemental material provides examples of case scenarios presented to the physicians.

## WEB APPENDIX A

### Format of Cases

We present four 10 year-old boys for your assessment on pages 3-6. For each case, we will ask whether you would... A. initiate treatment, and

B. continue treatment after 1 year, assuming it has been initiated by you or another physician.

#### A. Format for Decision to Initiate Treatment at Age 10

On pages 3-6, we will ask for your treatment recommendations for 4 cases that differ in these factors:

- Child's Growth Velocity
- Child's Current Height
- Predicted Adult Height (Bayley-Pinneau method, using bone age)
- Growth Hormone Price/Year
- Family (including child) Preference About Treatment

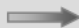

#### Treatment Recommendation:

- Growth Hormone?
- Aromatase Inhibitor?

The following description is common to all 4 presenting cases:

#### **Patient History:**

- Each boy has been followed by you for short stature for 2 years.
- Each boy is well and has no other medical problems.

**Past Medical History:** Unremarkable

Normal birth weight and length

**Review of Systems:** Negative

**Family:** Mother is 5'0" and father is 5'6", with normal ages of puberty. Target height is 5'5" - 5'6".

**Financial Information:** The family is of average income and has health insurance consistent with your practice.

#### **Physical Examination:**

- Weight is at the 3<sup>rd</sup>-5<sup>th</sup> percentile
- The child is pre-pubertal
- The rest of the exam is normal

#### **Laboratory Studies:**

- All normal, including: CBC, chemistry, IGF1, IGFBP3, and any other tests you order.
- GH levels are normal (peak 15 ng/ml on stimulation test).
- Bone age (somewhat delayed to somewhat advanced) is reflected in predicted adult height.

## CASE 1

### A. Please indicate your recommendation for the following case:

A 10 year-old boy with short stature of unknown cause, as described on page 2.

For this case, he has the characteristics indicated by the **bolded** values in the boxes below (growth chart enclosed).

The other cases may have characteristics shown in the faded boxes.

| Child's Growth Velocity | Child's Current Height                                   | Predicted Adult Height (using Bone Age)                 | GH Price per child/yr              | Family Preference About Treatment |
|-------------------------|----------------------------------------------------------|---------------------------------------------------------|------------------------------------|-----------------------------------|
| 3.2 cm/yr               | 47.0"/119cm<br>(-3SD, <1 <sup>st</sup> percentile)       | 5'1"/155cm<br>(-3SD, <1 <sup>st</sup> percentile)       | \$22,000/yr<br>(current price)     | Wishes to begin treatment         |
| <b>4.7 cm/yr</b>        | <b>49.6"/126cm</b><br>(-2SD, 2 <sup>nd</sup> percentile) | <b>5'4"/163cm</b><br>(-2SD, 2 <sup>nd</sup> percentile) | \$9,000/yr<br>(generic introduced) | Neutral about treatment           |

What is the likelihood that you would recommend each treatment below for this boy?

|                       | Very Unlikely            | Somewhat Unlikely        | Uncertain             | Somewhat Likely          | Very Likely              |
|-----------------------|--------------------------|--------------------------|-----------------------|--------------------------|--------------------------|
| • GH                  | <input type="checkbox"/> | <input type="checkbox"/> | <input type="radio"/> | <input type="checkbox"/> | <input type="checkbox"/> |
| • Aromatase Inhibitor | <input type="checkbox"/> | <input type="checkbox"/> | <input type="radio"/> | <input type="checkbox"/> | <input type="checkbox"/> |

## CASE 2

### A. Please indicate your recommendation for the following case:

A 10 year-old boy with short stature of unknown cause, as described on page 2.

He has the characteristics indicated by the **bolded** values in the boxes below (growth chart enclosed).

| Child's Growth Velocity | Child's Current Height                                   | Predicted Adult Height (using Bone Age)                 | GH Price per child/yr              | Family Preference About Treatment |
|-------------------------|----------------------------------------------------------|---------------------------------------------------------|------------------------------------|-----------------------------------|
| 3.2 cm/yr               | 47.0"/119cm<br>(-3SD, <1 <sup>st</sup> percentile)       | 5'1"/155cm<br>(-3SD, <1 <sup>st</sup> percentile)       | \$22,000/yr<br>(current price)     | Wishes to begin treatment         |
| <b>4.7 cm/yr</b>        | <b>49.6"/126cm</b><br>(-2SD, 2 <sup>nd</sup> percentile) | <b>5'4"/163cm</b><br>(-2SD, 2 <sup>nd</sup> percentile) | \$9,000/yr<br>(generic introduced) | Neutral about treatment           |

What is the likelihood that you would recommend each treatment below for this boy?

|                       | Very Unlikely            | Somewhat Unlikely        | Uncertain             | Somewhat Likely          | Very Likely              |
|-----------------------|--------------------------|--------------------------|-----------------------|--------------------------|--------------------------|
| • GH                  | <input type="checkbox"/> | <input type="checkbox"/> | <input type="radio"/> | <input type="checkbox"/> | <input type="checkbox"/> |
| • Aromatase Inhibitor | <input type="checkbox"/> | <input type="checkbox"/> | <input type="radio"/> | <input type="checkbox"/> | <input type="checkbox"/> |

### CASE 3

#### A. Please indicate your recommendation for the following case:

A 10 year-old boy with short stature of unknown cause, as described on page 2.  
He has the characteristics indicated by the **bolded** values in the boxes below (growth chart enclosed).

| Child's Growth Velocity | Child's Current Height                                    | Predicted Adult Height (using Bone Age)                  | GH Price per child/yr                 | Family Preference About Treatment |
|-------------------------|-----------------------------------------------------------|----------------------------------------------------------|---------------------------------------|-----------------------------------|
| 3.2 cm/yr               | <b>47.0"/119cm</b><br>(-3SD, <1 <sup>st</sup> percentile) | <b>5'1"/155cm</b><br>(-3SD, <1 <sup>st</sup> percentile) | <b>\$22,000/yr</b><br>(current price) | <b>Wishes to begin treatment</b>  |
| <b>4.7 cm/yr</b>        | 49.6"/126cm<br>(-2SD, 2 <sup>nd</sup> percentile)         | 5'4"/163cm<br>(-2SD, 2 <sup>nd</sup> percentile)         | \$9,000/yr<br>(generic introduced)    | Neutral about treatment           |

What is the likelihood that you would recommend each treatment below for this boy?

|                       | Very Unlikely            | Somewhat Unlikely        | Uncertain             | Somewhat Likely          | Very Likely              |
|-----------------------|--------------------------|--------------------------|-----------------------|--------------------------|--------------------------|
| • GH                  | <input type="checkbox"/> | <input type="checkbox"/> | <input type="radio"/> | <input type="checkbox"/> | <input type="checkbox"/> |
| • Aromatase Inhibitor | <input type="checkbox"/> | <input type="checkbox"/> | <input type="radio"/> | <input type="checkbox"/> | <input type="checkbox"/> |

### CASE 4

#### A. Please indicate your recommendation for the following case:

A 10 year-old boy with short stature of unknown cause, as described on page 2.  
He has the characteristics indicated by the **bolded** values in the boxes below (growth chart enclosed).

| Child's Growth Velocity | Child's Current Height                                    | Predicted Adult Height (using Bone Age)                 | GH Price per child/yr                     | Family Preference About Treatment |
|-------------------------|-----------------------------------------------------------|---------------------------------------------------------|-------------------------------------------|-----------------------------------|
| 3.2 cm/yr               | <b>47.0"/119cm</b><br>(-3SD, <1 <sup>st</sup> percentile) | 5'1"/155cm<br>(-3SD, <1 <sup>st</sup> percentile)       | \$22,000/yr<br>(current price)            | Wishes to begin treatment         |
| <b>4.7 cm/yr</b>        | 49.6"/126cm<br>(-2SD, 2 <sup>nd</sup> percentile)         | <b>5'4"/163cm</b><br>(-2SD, 2 <sup>nd</sup> percentile) | <b>\$9,000/yr</b><br>(generic introduced) | <b>Neutral about treatment</b>    |

What is the likelihood that you would recommend each treatment below for this boy?

|                       | Very Unlikely            | Somewhat Unlikely        | Uncertain             | Somewhat Likely          | Very Likely              |
|-----------------------|--------------------------|--------------------------|-----------------------|--------------------------|--------------------------|
| • GH                  | <input type="checkbox"/> | <input type="checkbox"/> | <input type="radio"/> | <input type="checkbox"/> | <input type="checkbox"/> |
| • Aromatase Inhibitor | <input type="checkbox"/> | <input type="checkbox"/> | <input type="radio"/> | <input type="checkbox"/> | <input type="checkbox"/> |
